# Supplementary material for: Uninterrupted galvanic reaction for scalable and rapid synthesis of metallic and bimetallic sponges/dendrites as efficient catalysts for 4-nitrophenol reduction
Source: Royal Society of Chemistry journal article supplement (doi:10.1039/c4dt03426k), 2015-01-01
Supplement: c4dt03426k1.pdf [file c4dt03426k1.pdf]

## Uninterrupted galvanic reaction for scalable & rapid Synthesis of metallic and bimetallic sponges/dendrites for efficient catalyst for 4-nitrophenol reduction

Barun Kumar Barman and Karuna Kar Nanda\*

Materials Research Centre, Indian Institute of Science, Bangalore-560012, India

### The yield calculation:

#### Cu:

Mol. Wt. of  $\text{CuSO}_4 \cdot 5\text{H}_2\text{O}$  = 249.70, Mol. Wt. of Cu = 63.546

1000 ml of 1M  $\text{CuSO}_4 \cdot 5\text{H}_2\text{O}$  solution  $\equiv$  63.546 gm. Cu

2.5 ml of 0.2M  $\text{CuSO}_4 \cdot 5\text{H}_2\text{O}$  solution  $\equiv$  0.0317 gm. Cu

Experimentally, when we immersed ~26 mg (3cm) of Mg ribbon in 2.5 ml of 0.2M  $\text{CuSO}_4 \cdot 5\text{H}_2\text{O}$  solution + 0.5 ml of 5M  $\text{H}_2\text{SO}_4$  solution, we get ~26.4 mg of Cu.

The yield of Cu  $\equiv$  83 %

For synthesis of 1 gm. of Cu spongy structures, accordingly, we increased the corresponding precursor. For this case, we used 100 ml of 0.2 M of  $\text{CuSO}_4 \cdot 5\text{H}_2\text{O}$  solution + 20 ml of 5M  $\text{H}_2\text{SO}_4$  solution along with 1.4 gm. of Mg ribbon. Then we get around 0.96 gm. of Cu sponge. So, we can really predict the synthesized product.

#### Ag:

Mol. Wt. of  $\text{AgNO}_3$  = 169.87 Mol. Wt. of Ag = 107.86

1000 ml of 1 M  $\text{AgNO}_3$  solution  $\equiv$  107.86

2.5 ml of 0.05 M  $\text{AgNO}_3$  solution  $\equiv$  0.0135 gm. of Ag

Experimentally, when we immersed ~26 mg (3cm) of Mg ribbon in 2.5 ml of 0.05  $\text{AgNO}_3$  solution + 0.5 ml of 5M  $\text{H}_2\text{SO}_4$  solution, we get ~10.93 mg of Ag.

The yield of Ag  $\equiv$  81 %

#### Sn:

Mol. Wt. of  $\text{SnCl}_2 \cdot 2\text{H}_2\text{O}$  = 225.64 Mol. Wt. of Sn = 118.17

1000 ml of 1M  $\text{SnCl}_2 \cdot 2\text{H}_2\text{O}$  solution  $\equiv$  118.71 gm. of Sn

2.5 ml of 0.2 M  $\text{SnCl}_2 \cdot 2\text{H}_2\text{O}$  solution  $\equiv$  0.059 gm. of Sn

Experimentally, when we immersed ~26 mg (3cm) of Mg ribbon in 2.5 ml of 0.2 M  $\text{SnCl}_2 \cdot 2\text{H}_2\text{O}$  solution + 0.5 ml of 5M  $\text{H}_2\text{SO}_4$  solution, we get ~ 47 mg of Sn.

The yield of Sn= 80%

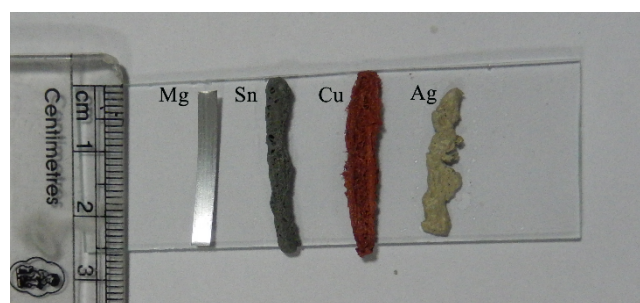

**Fig1.** Photograph of ~2.5 cm of Mg ribbon and Sn, Cu and Ag sponge structures after complete etching of the Mg ribbon.

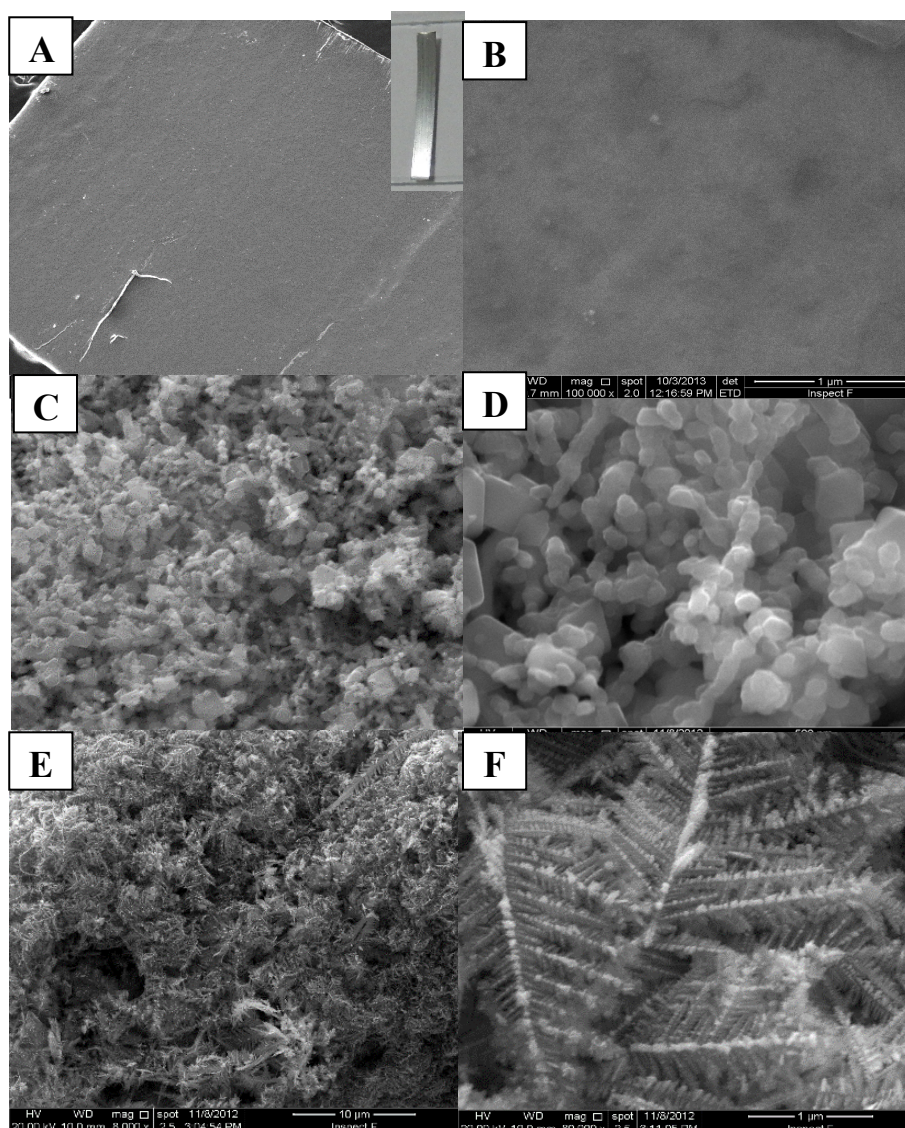

**Fig.2** SEM images of Mg ribbon (A & B) and Cu (C & D) and Ag (E & F) nanostructures grown on the Mg ribbon (inset) in absence of acid.

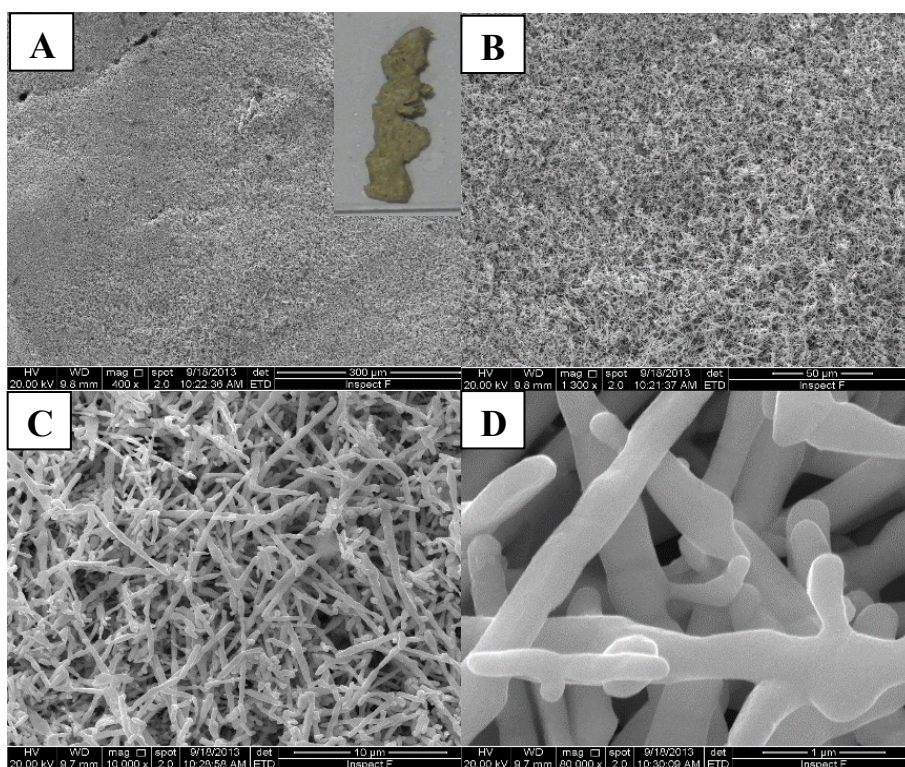

**Fig.3 (A-D) SEM images of different magnification of spongy Ag nanostructures obtained with 2.5 ml of 0.05 M  $\text{AgNO}_3$  and 0.6 ml of 5M  $\text{H}_2\text{SO}_4$ .**

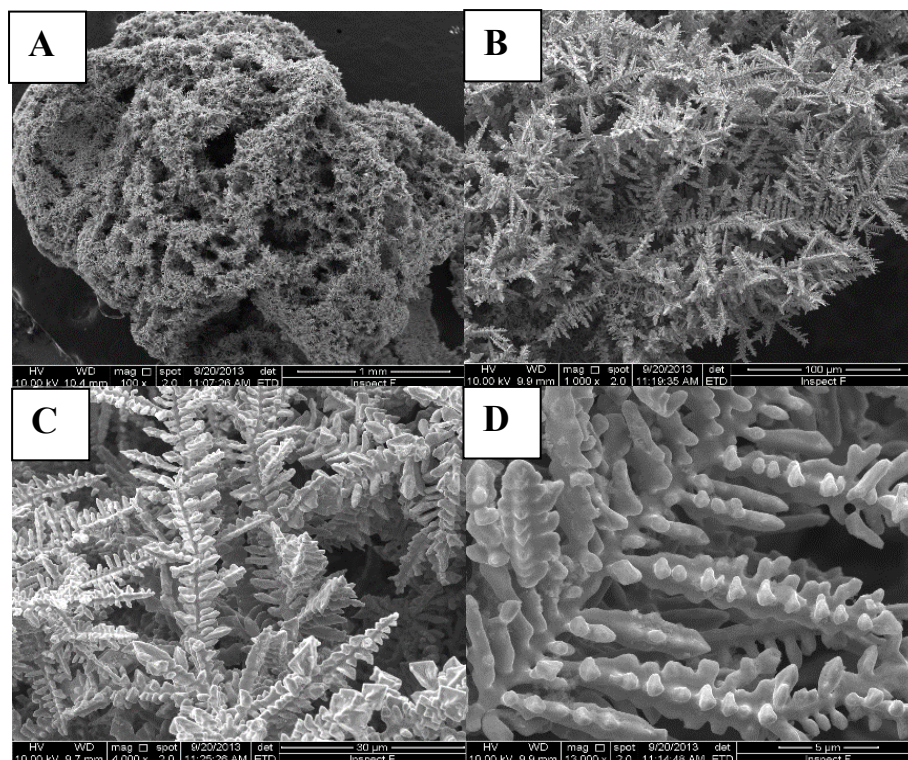

Fig.4 SEM images of spongy Sn obtained with 2.5 ml of 0.1M  $\text{SnCl}_2 \cdot 2\text{H}_2\text{O}$  and 0.6 ml of 5 M  $\text{H}_2\text{SO}_4$ .

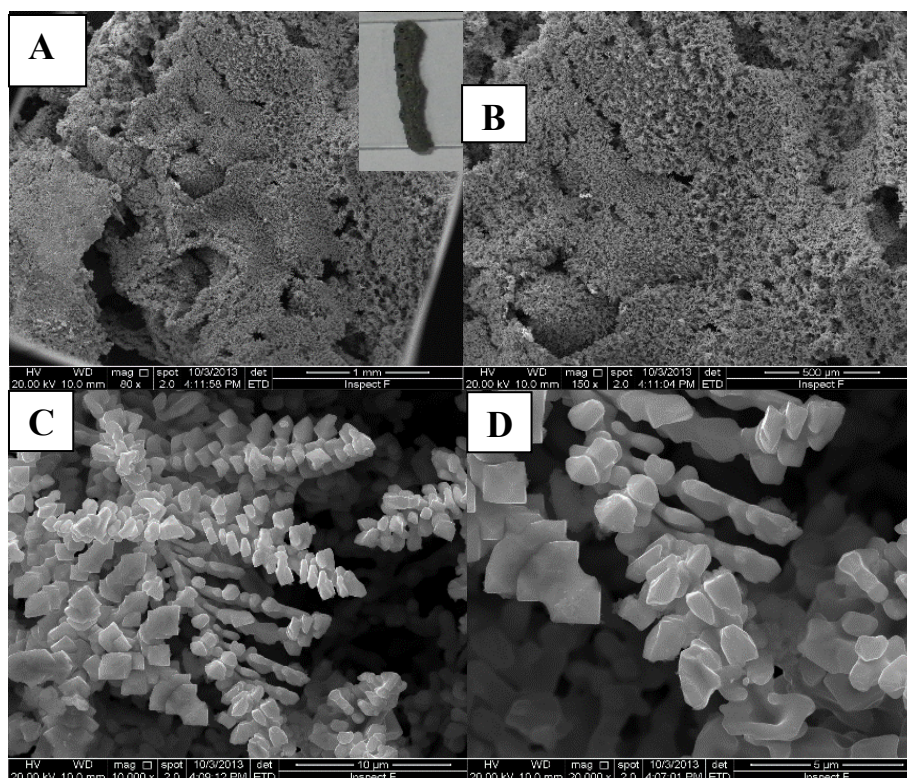

Fig.5 SEM images of spongy Sn obtained with 2.5 ml of 0.2 M  $\text{SnCl}_2 \cdot 2\text{H}_2\text{O}$  and 0.6 ml of 5M  $\text{H}_2\text{SO}_4$ .

**Cu sponge:**

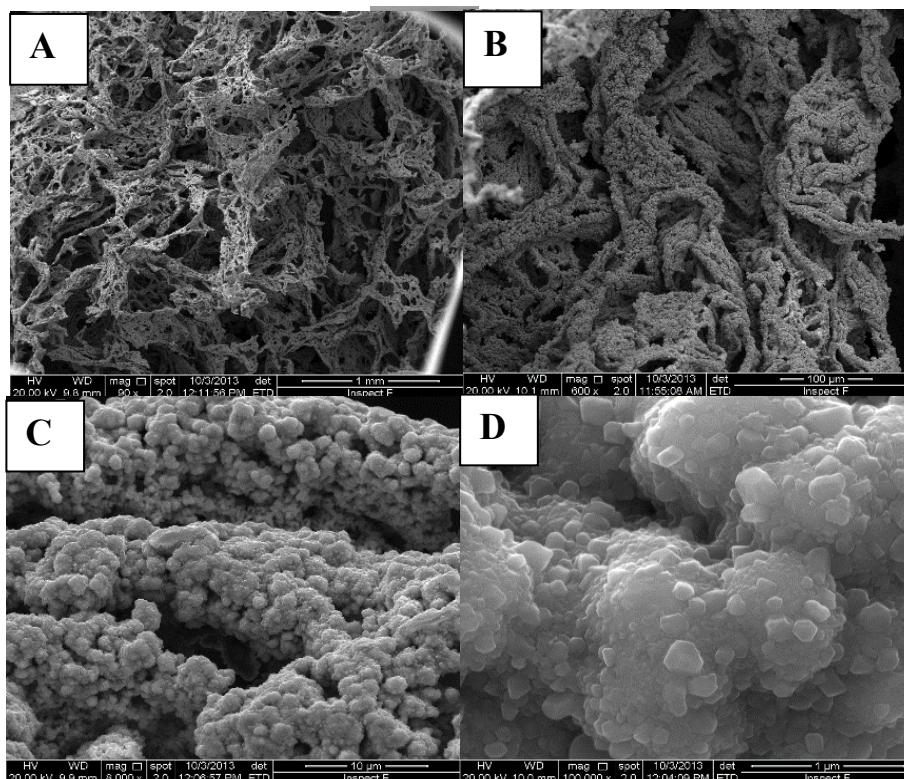

**Fig.6 SEM images of spongy Cu obtained with 2.5 ml of 0.2 M  $\text{CuSO}_4 \cdot 5\text{H}_2\text{O}$  solution and 0.5 ml of 5M  $\text{H}_2\text{SO}_4$ . No change in morphology was observed when 0.1 M  $\text{CuSO}_4 \cdot 5\text{H}_2\text{O}$  solution was used. However, the amount was half in quantity.**

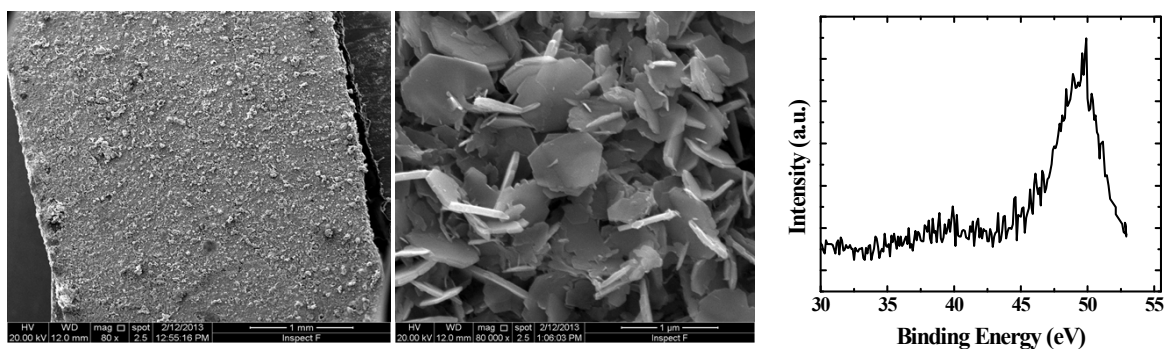

**Fig.7 (A & B) SEM images of  $\text{Mg}(\text{OH})_2$  nanostructures formation on Mg foil surfaces when we performed the experiment in absence of acid medium. (C) XPS spectrum of Mg 2p in  $\text{Mg}(\text{OH})_2$  (corresponding of to the binding energy 49.6 eV).<sup>1</sup>**

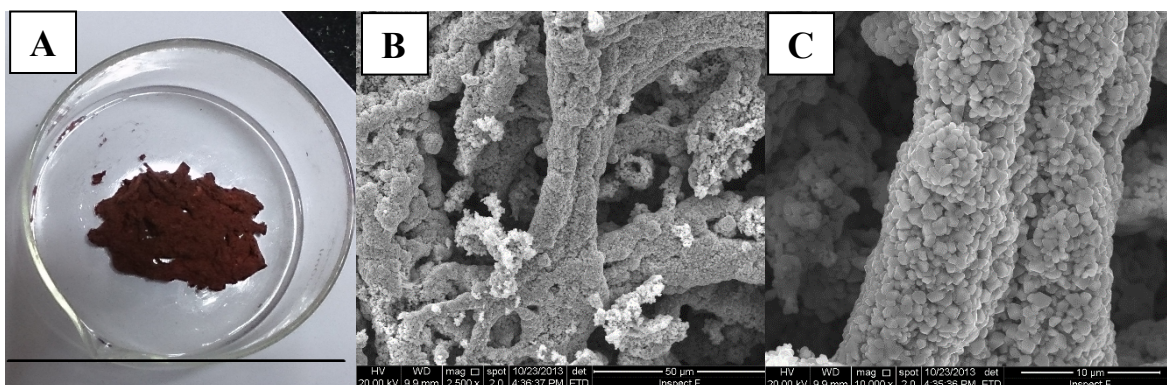

**Fig.8** Photograph and SEM images of spongy structures of gram scale synthesis of Cu. The scale bar corresponds to 9 cm.

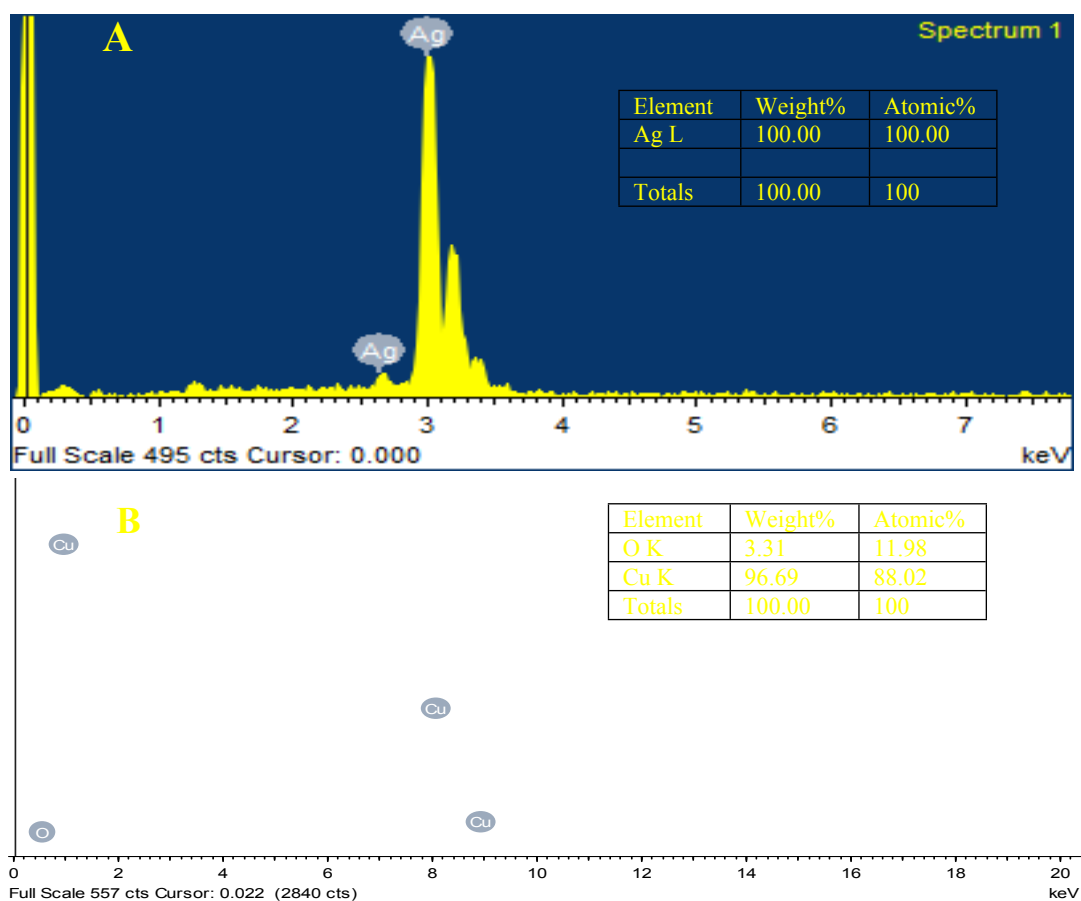

**Fig. 8.** (A and B) EDS spectra of spongy Ag and Cu nanostructures .

**Cu-Ag bimetallic dendritic nanostructures:**

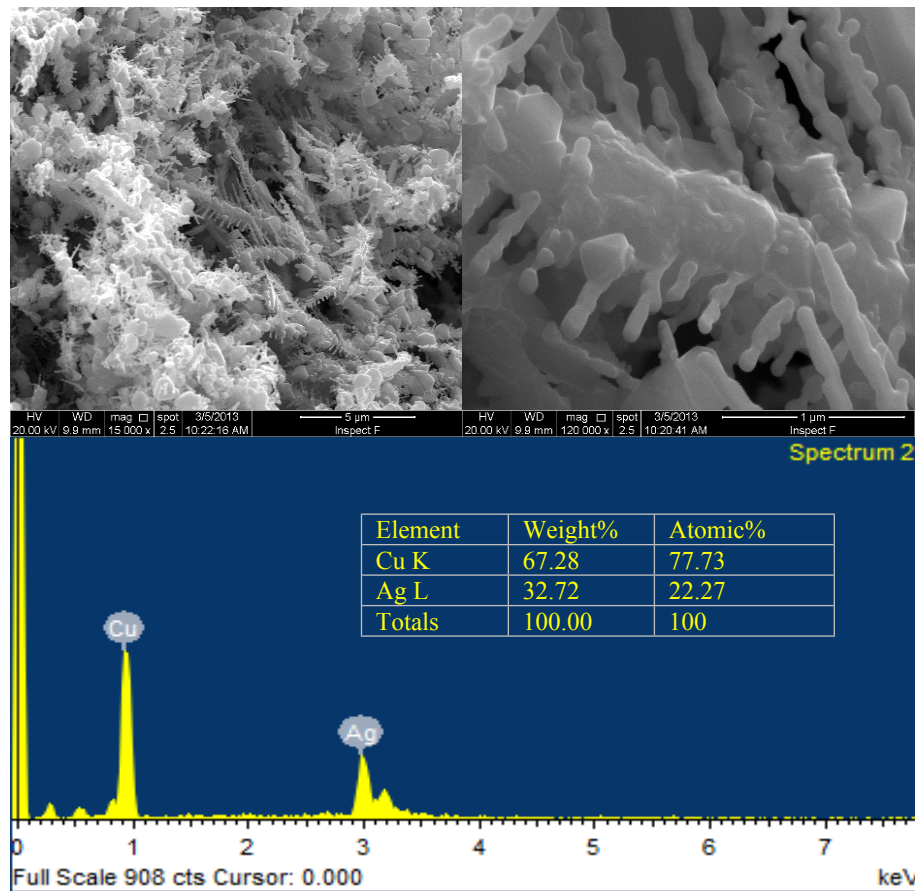

**Fig. 9 SEM images with different magnifications and EDS spectra of Ag<sub>33</sub>Cu<sub>67</sub>.**

:

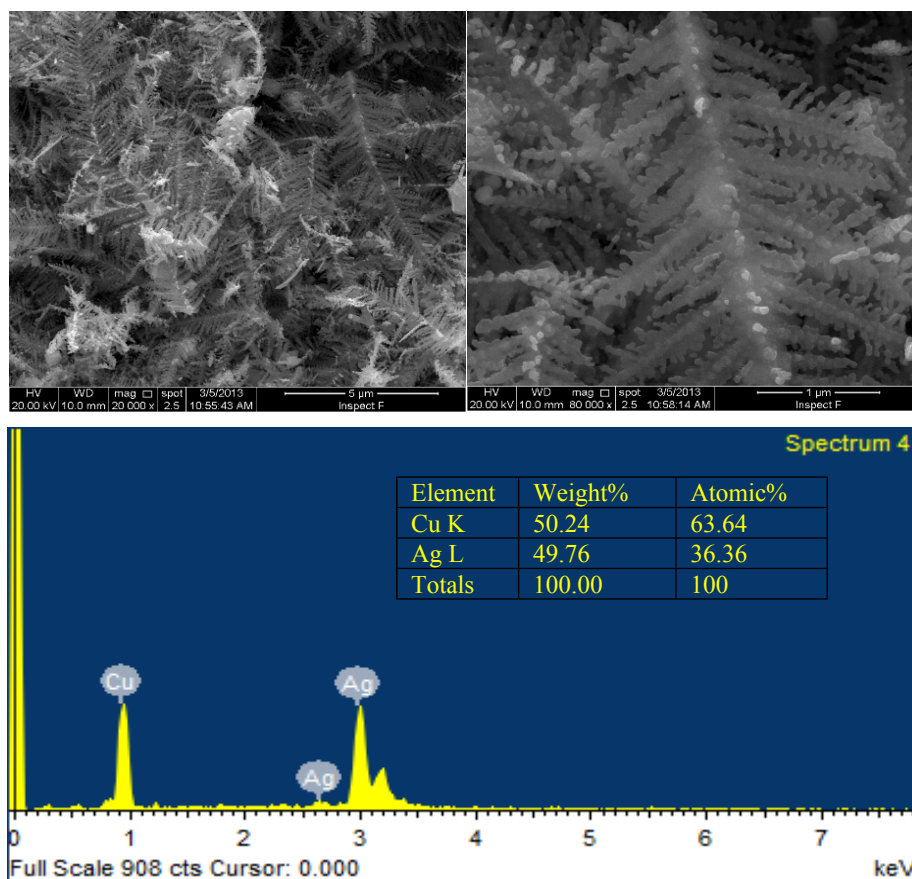

Fig. 10 SEM images with different magnifications and EDS spectra of  $\text{Ag}_{50}\text{Cu}_{50}$ .

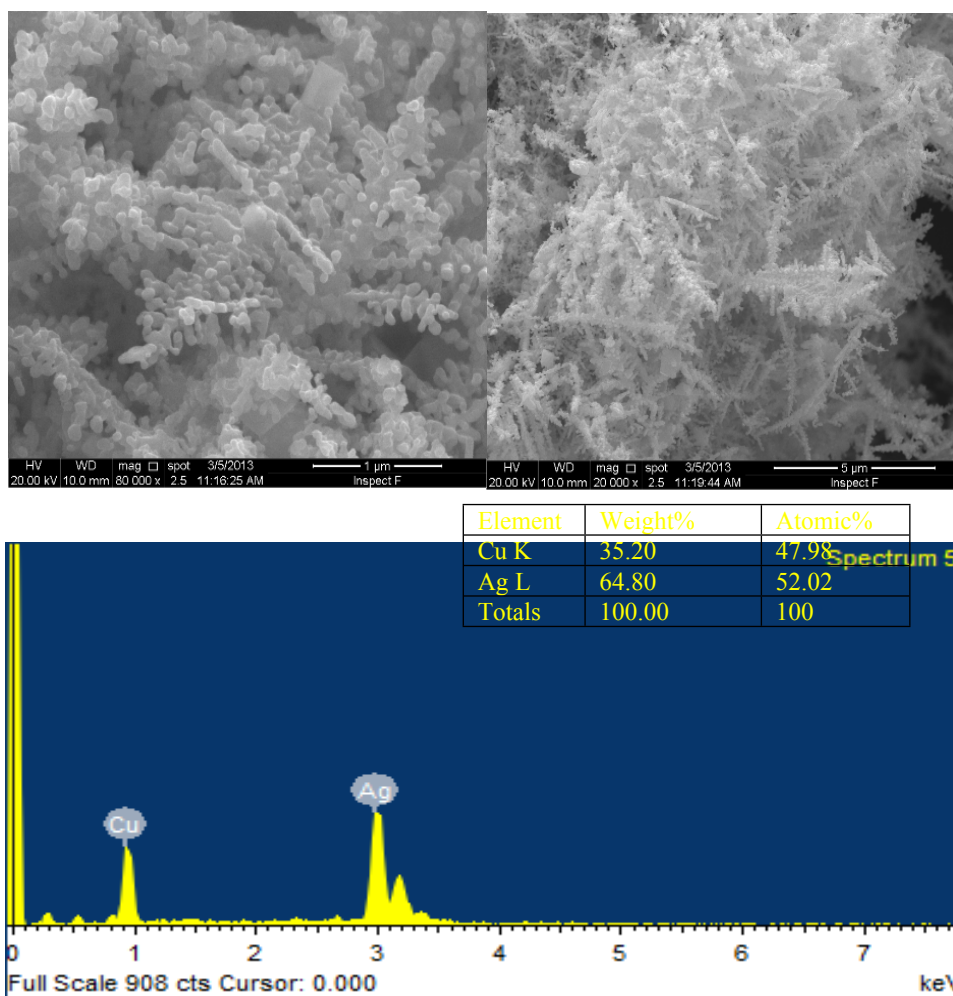

**Fig. SEM images with different magnifications and EDS spectra of  $\text{Ag}_{65}\text{Cu}_{35}$ .**

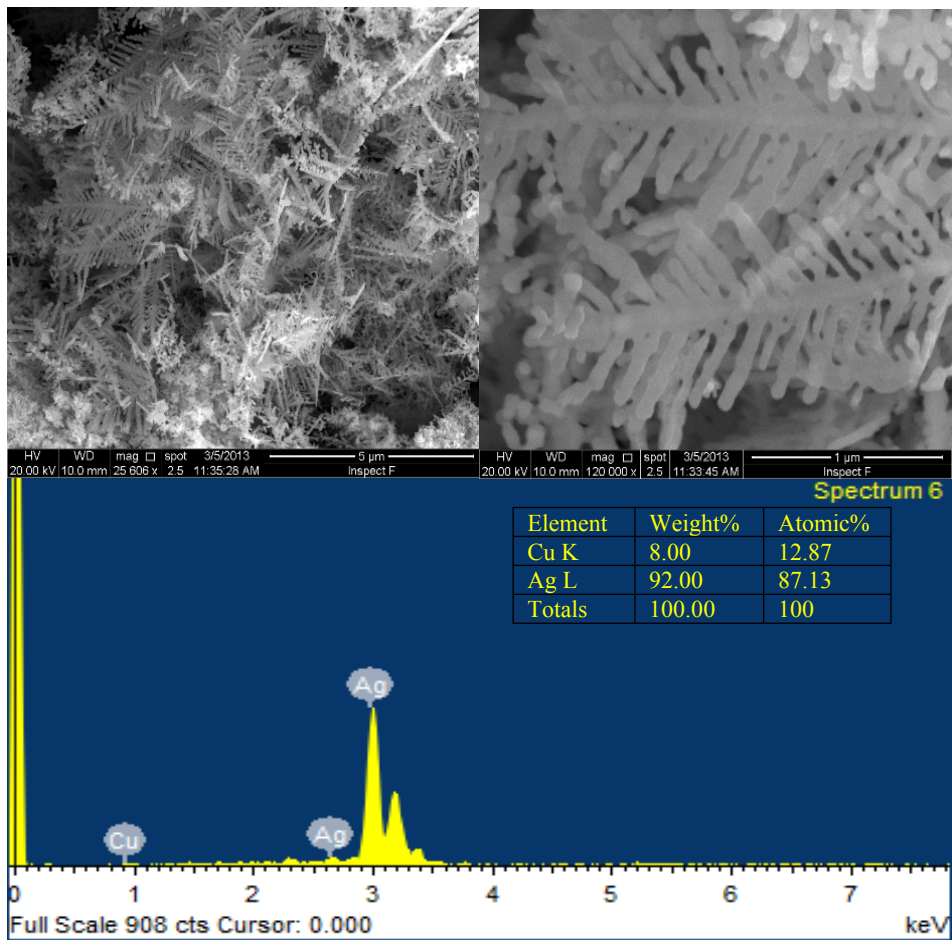

Fig. 12 SEM images with different magnifications and EDS spectra of  $\text{Ag}_{92}\text{Cu}_8$ .

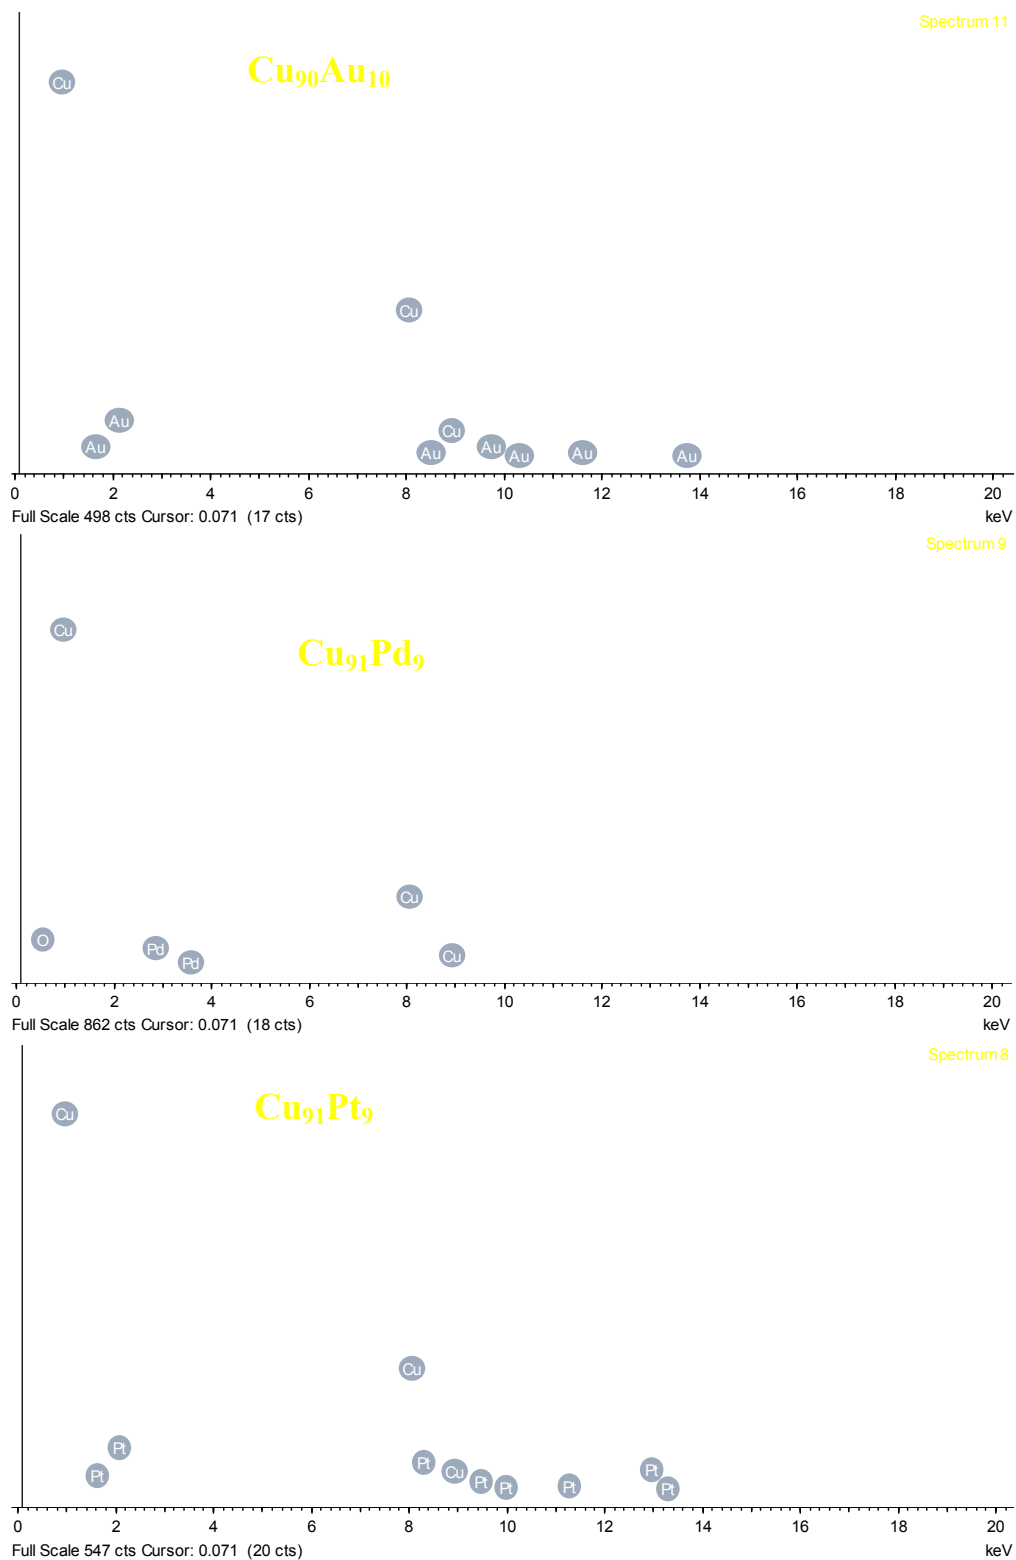

**Fig. 13 EDS spectra of various kind of bimetallic nanostructures with the Au, Pt and Pd.**

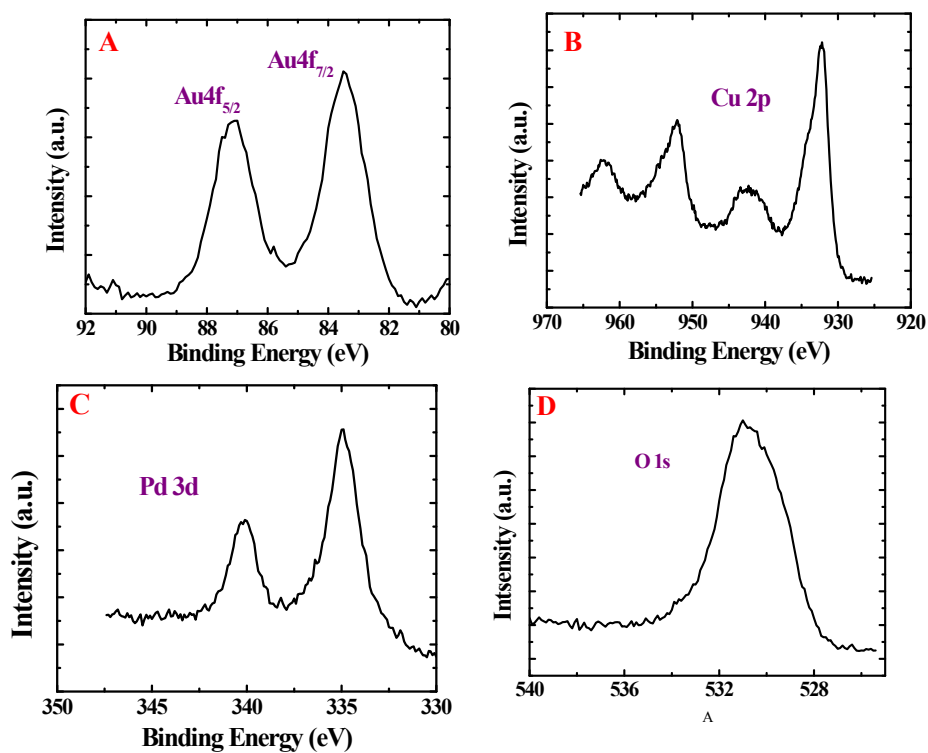

**Fig. 14 (A-D) High resolution XPS spectra of individual Cu, Pd, Au and O in CuPdAu dendritic nanostructures.**

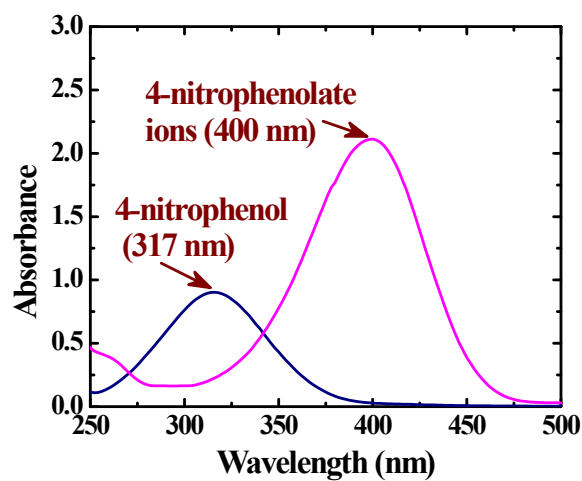

**Fig.15 UV-vis spectra of 4-nitrophenol before and after adding NaBH<sub>4</sub> solution.**

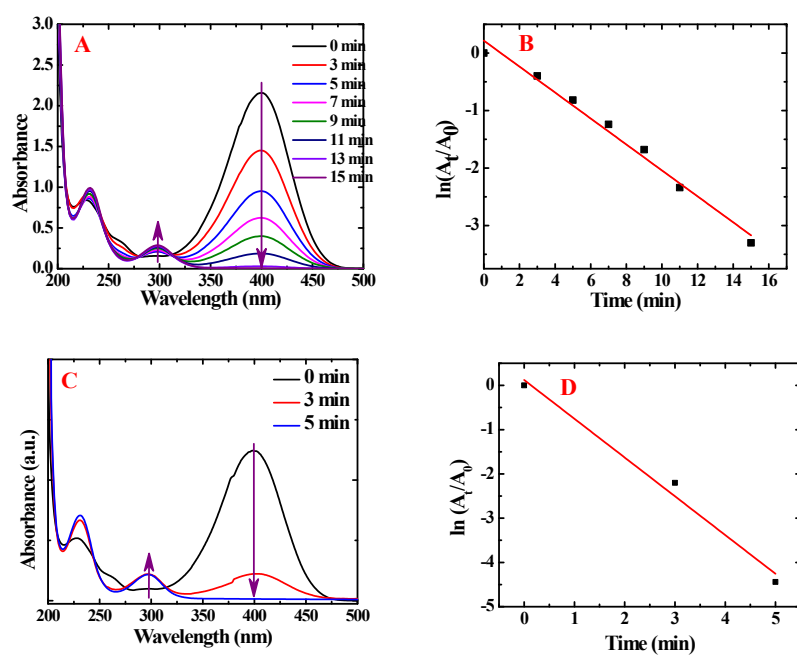

**Fig. 16 (A and B) 4-NP reduction by commercially available bulk Cu powder (10 ml of 1 mM 4-NP and 10 ml of 50 mM  $\text{NaBH}_4$  solution and 5 mg of catalyst) and its pseudo first order rate kinetics plot. (C and D) 4-NP reduction by  $\text{Cu}_{35}\text{Ag}_{65}$  and its pseudo first order rate kinetics plot.**

## Reference

1. Y. Zhua, G. Wub, Y. H. Zhanga, Q. Zhaoa, *Applied Surface Science*, **2011**, 257, 6129–6137.
